# Supplementary material for: Low-grade proteinuria and atherosclerotic cardiovascular disease: A transition study of patients with diabetic kidney disease
Source: PubMed Central journal article supplement (PMC8880428; doi:10.1371/journal.pone.0264568), 2022-02-25
Supplement: pone.0264568.s001.pdf [file pone.0264568.s001.pdf]

**Supplementary table1. Characteristics of patients with or without the data of UPCR**

| Variables                         | UPCR                 |                  | P value |
|-----------------------------------|----------------------|------------------|---------|
|                                   | Not missing<br>N=395 | Missing<br>N=48  |         |
| Age (years)                       | 66.0 (12.8)          | 64.4 (12.3)      | 0.43    |
| Male (%)                          | 72.4                 | 72.9             | 1.00    |
| <b>Classification of diabetes</b> |                      |                  |         |
| Type 1 (%)                        | 3.3                  | 6.3              | 0.40    |
| Type 2 (%)                        | 96.5                 | 93.8             | 0.41    |
| Pancreatic (%)                    | 0.3                  | 0.0              | 1.00    |
| Diabetes duration (years)         | 15.3 [8,3-23.4]      | 18.3 [11.2-26.5] | 0.09    |
| Systolic blood pressure (mmHg)    | 152 (25)             | 152 (27)         | 0.98    |
| eGFR (mL/min/1.73m <sup>2</sup> ) | 5.6 (2.1)            | 5.2 (1.8)        | 0.37    |
| Renal length (mm)                 | 92.3 (13.9)          | 97.3 (13.6)      | 0.97    |
| <b>Body mass index</b>            |                      |                  |         |
| At dialysis initiation            | 25.1 (4.6)           | 23.6 (4.4)       | 0.04    |
| At discharge                      | 22.6 (3.9)           | 21.2 (3.8)       | 0.02    |
| Overhydration rate (%)            | 8.4 [4.1-16.0]       | 8.5 [4.0-13.4]   | 0.73    |
| <b>Laboratory data</b>            |                      |                  |         |
| Albumin (g/dL)                    | 2.9 (0.6)            | 2.9 (0.5)        | 0.74    |
| LDL (mg/dL)                       | 92 (37)              | 87 (31)          | 0.40    |
| HbA1c (%)                         | 6.0 (0.8)            | 6.2 (0.9)        | 0.25    |
| <b>Prior history (%)</b>          |                      |                  |         |
| Advanced diabetic retinopathy     | 43.2                 | 46.3             | 0.74    |
| Coronary artery disease           | 17.0                 | 16.7             | 1.00    |
| Heart failure                     | 22.5                 | 25.0             | 0.72    |
| Cerebral infarction               | 13.2                 | 14.6             | 0.82    |
| Peripheral arterial disease       | 11.9                 | 20.8             | 0.11    |
| <b>Smoking status (%)</b>         |                      |                  |         |
| Current                           | 21.0                 | 16.7             | 0.57    |
| Past                              | 26.6                 | 27.1             | 1.00    |
| Never                             | 48.9                 | 50.0             | 1.00    |
| Unknown                           | 0.4                  | 0.6              | 0.42    |
| <b>Prescriptions</b>              |                      |                  |         |
| Aspirin                           | 38.5                 | 41.7             | 0.75    |

|                 |      |      |      |
|-----------------|------|------|------|
| Statin          | 43.5 | 31.3 | 0.12 |
| Insulin         | 36.7 | 35.4 | 1.00 |
| RAAS inhibitors | 54.4 | 68.8 | 0.07 |

Abbreviations: eGFR, estimated glomerular filtration rate; HbA1c, glycated hemoglobin A1c; LDL, low density lipoprotein; OH-R, overhydration rate; RAAS, renin-angiotensin-aldosterone system; UPCR, urinary protein creatinine ratio.
